# Supplementary material for: NK Cell–Specific CDK8 Deletion Enhances Antitumor Responses
Source: Oxford University Press journal article supplement (doi:10.1158/2326-6066.cir-17-0183), 2018-01-31
Supplement: 23266066cir170183-sup-181765_3_supp_4528414_p33y4b.pdf [file 23266066cir170183-sup-181765_3_supp_4528414_p33y4b.pdf]

Figure S2

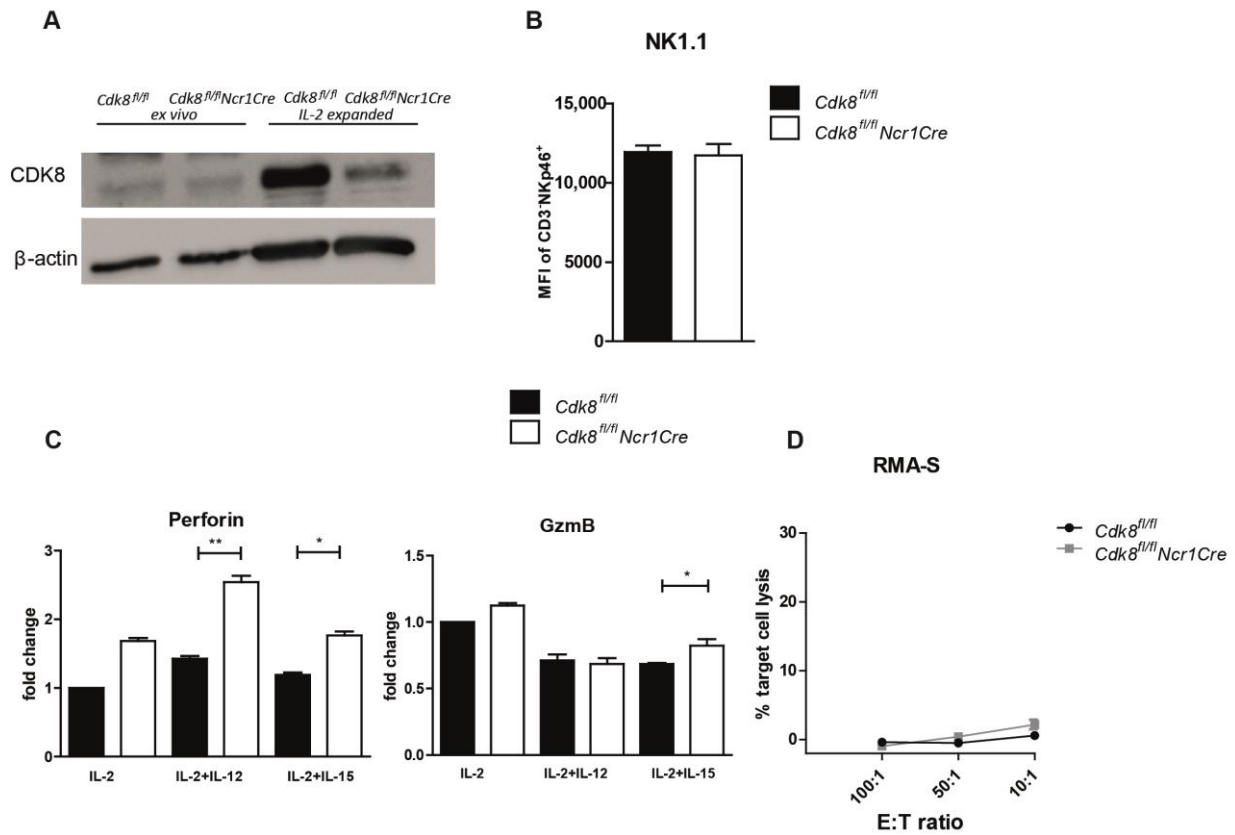

**Figure S2.** (A) *Ex vivo* or IL-2 expanded NK cells derived from *Cdk8<sup>fl/fl</sup>* and *Cdk8<sup>fl/fl</sup>Ncr1Cre* mice were analyzed for CDK8 protein expression by western blot. (B) The surface expression of the NK1.1 receptor was assessed by analyzing the MFI of CD3<sup>+</sup>NKp46<sup>+</sup> NK cells. Bar graph shows mean  $\pm$  SEM of two independent experiments; n=5-6. (C) Western blots from Fig. 2E were quantified and the bar graphs present mean fold of change compared to IL-2 stimulated *Cdk8<sup>fl/fl</sup>* cells from 3 exposures  $\pm$  SEM. (D) *Cdk8<sup>fl/fl</sup>* and *Cdk8<sup>fl/fl</sup>Ncr1Cre* splenocytes were incubated for 4h with CFSE-stained RMA-S cells in effector-to-target ratios of 100:1, 50:1 and 10:1. The specific lysis of target cells was assessed by flow cytometry. Symbols and error bars represent mean  $\pm$  SEM of technical triplicates from one experiment. \* p < 0.05; \*\* p < 0.01.
